# Supplementary material for: Disruption of Irisin Dimerization by FDA-Approved Drugs: A Computational Repurposing Approach for the Potential Treatment of Lipodystrophy Syndromes
Source: MDPI journal article supplement (doi:10.3390/ijms24087578), 2023-04-20
Supplement: s1 [file s1]

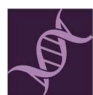

*Supplementary material*

# Disruption of Irisin Dimerization by FDA-approved Drugs. A Computational Repurposing Approach for the Potential Treatment of Lipodystrophy Syndromes

Lorenzo Flori <sup>1,a</sup>, Simone Brogi <sup>1,2,a,\*</sup>, Hajar Sirous<sup>2</sup> and Vincenzo Calderone<sup>1</sup>

<sup>1</sup> Department of Pharmacy, University of Pisa, Via Bonanno 6, 56126 Pisa, Italy

<sup>2</sup> Bioinformatics Research Center, School of Pharmacy and Pharmaceutical Sciences, Isfahan University of Medical Sciences, 81746-73461 Isfahan, Iran

<sup>a</sup> These authors contributed equally to this work

\* Correspondence: simone.brogi@unipi.it

**Table of Contents**

**Figure S1**

page S2

**Irisin/Diquafosal**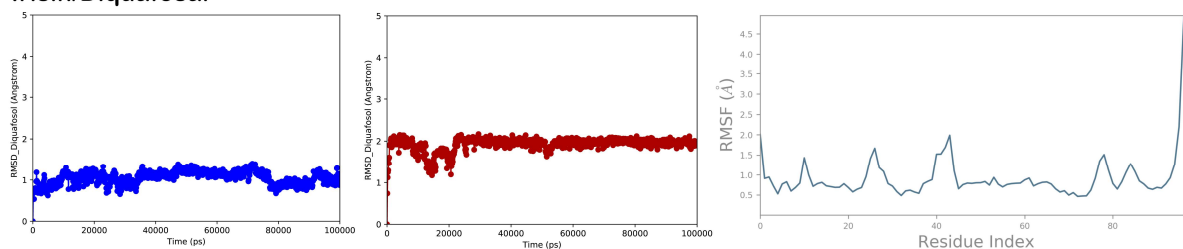**Irisin/Isepanamicin**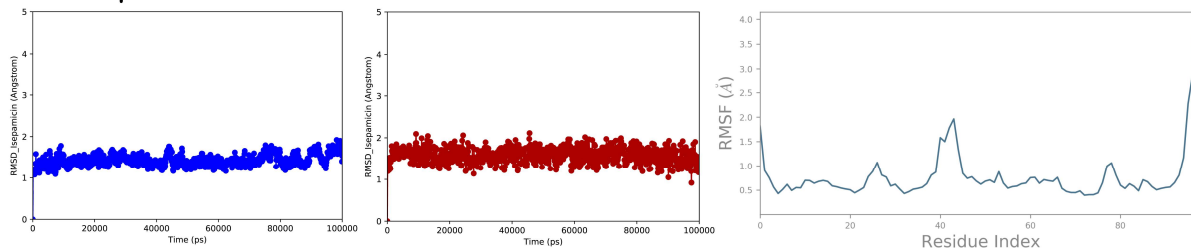**Irisin/Iohexol**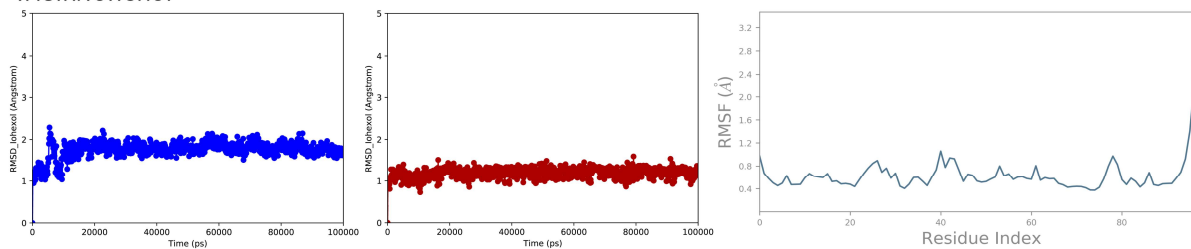**Irisin/Voglibose**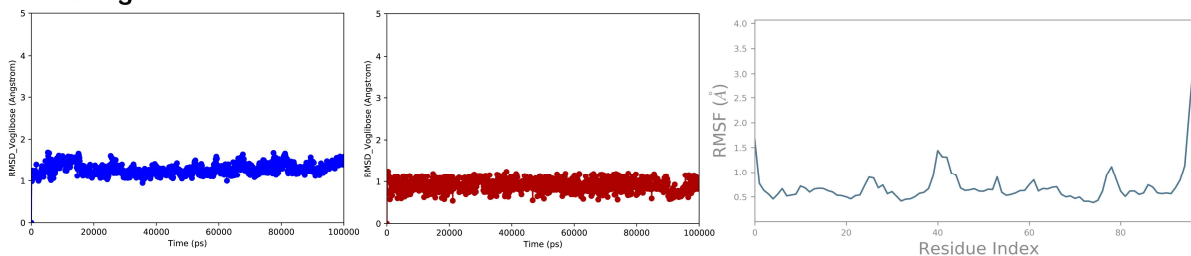**Irisin/Troxerutin**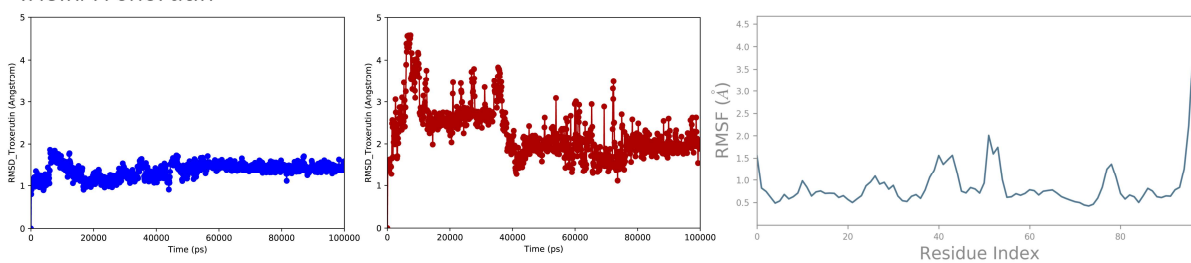**Irisin/Paromomycin**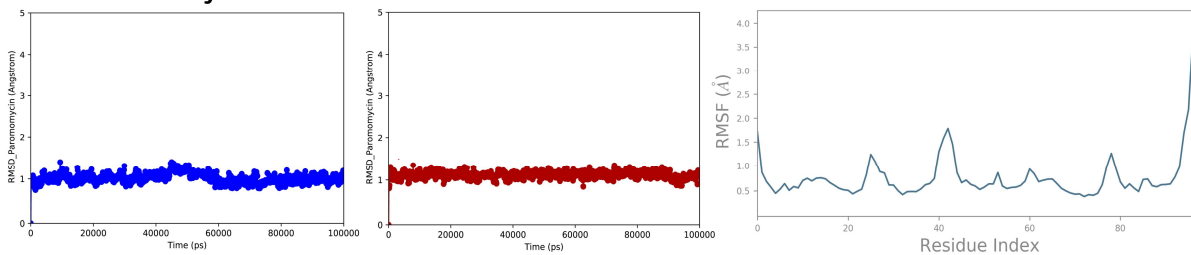

Continue

**Irisin/Amikacin**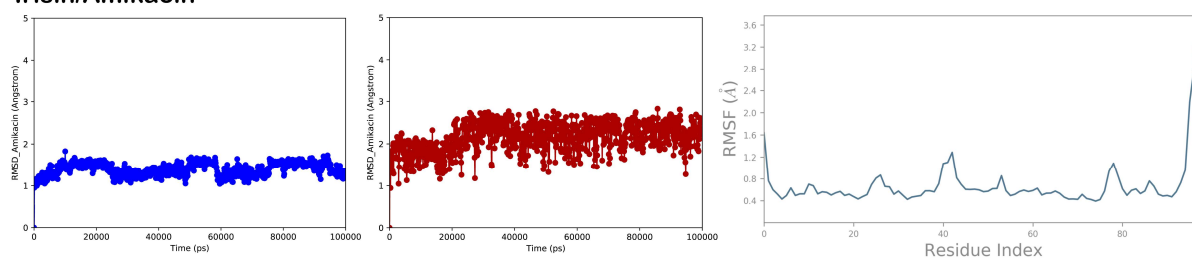**Irisin/Benserazide**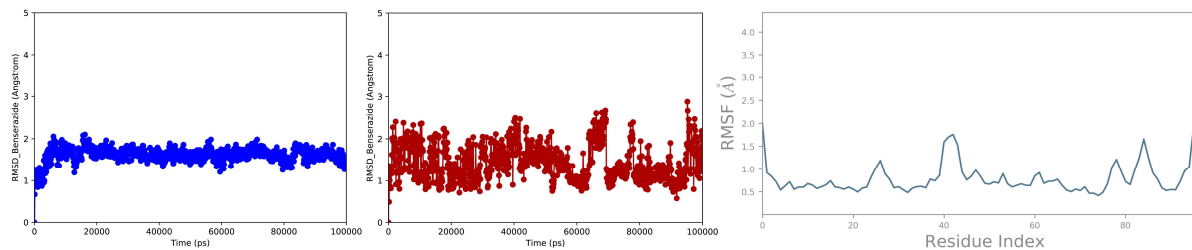**Irisin/Lactulose**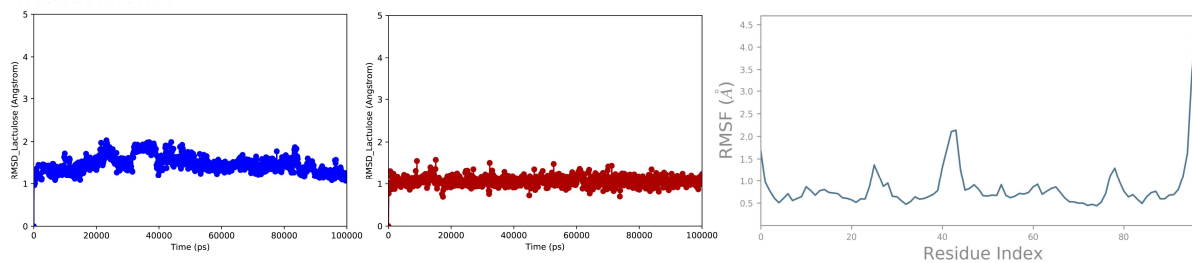**Irisin/Acarbose**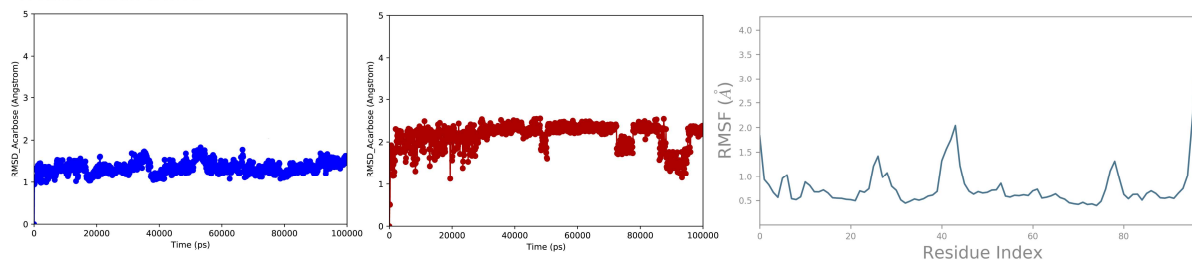**Irisin/Hesperidin**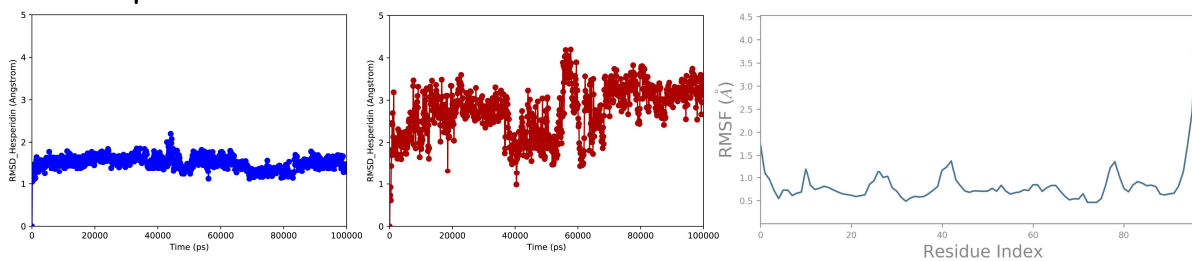**Irisin/Astragaloside IV**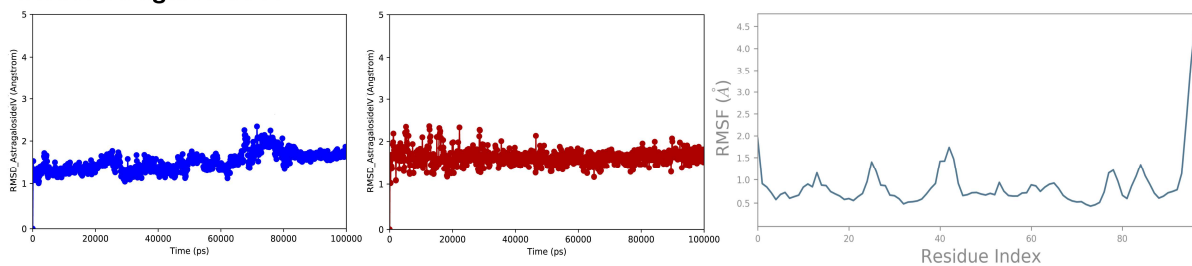

Continue

**Irisin/Zoledronate**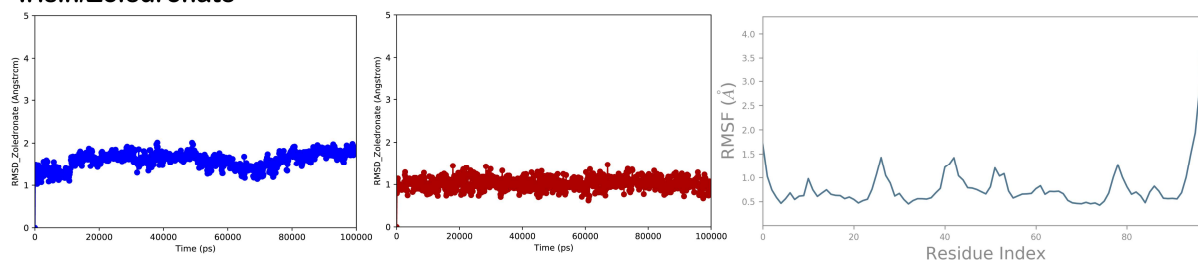**Irisin/Setmelanotide**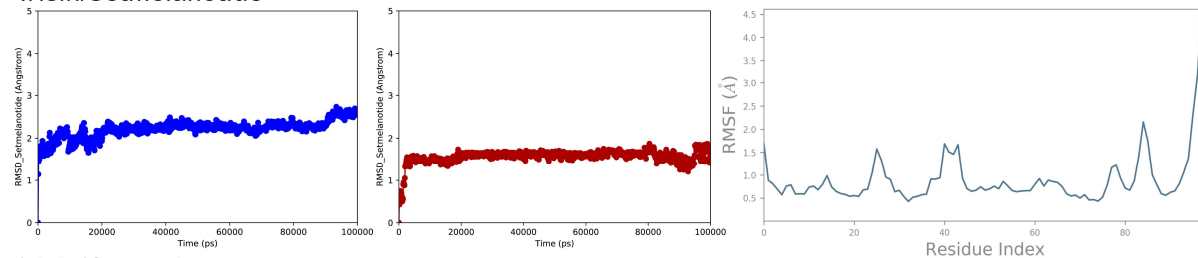**Irisin/Carnosine**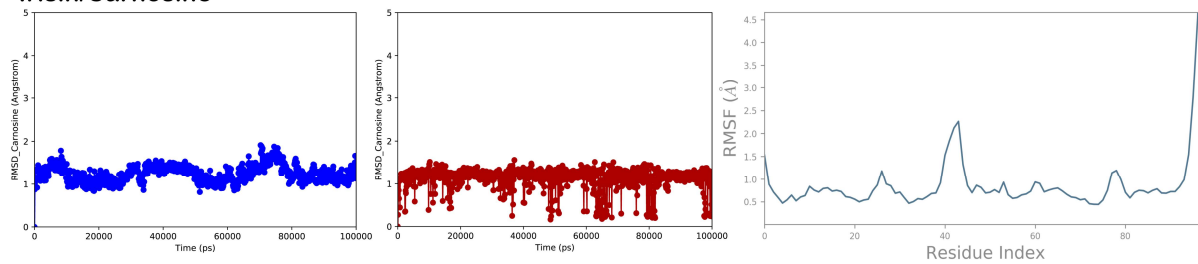**Irisin/Edotecarin**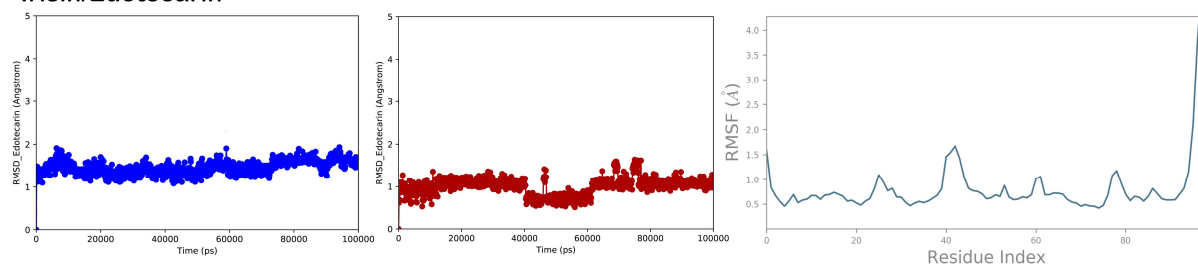**Irisin/Iopamidol**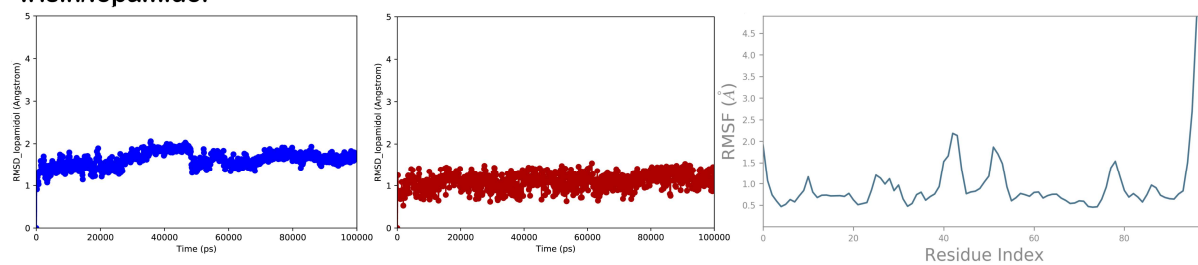**Irisin/Echinacoside**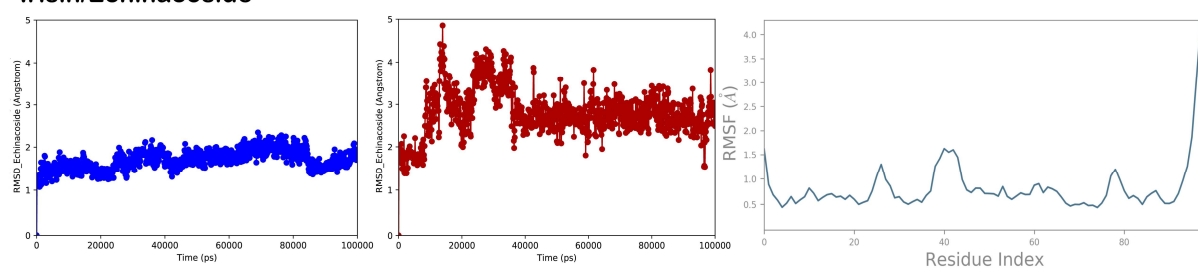

Continue

**Irisin/Protirelin**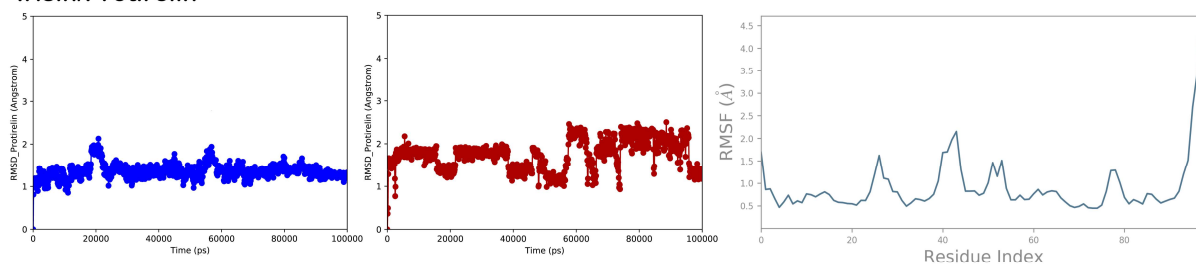**Irisin/Thymopentin**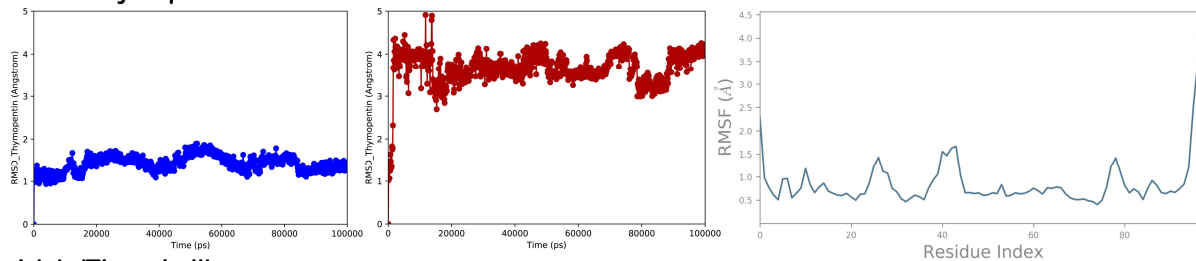**Irisin/Theophylline**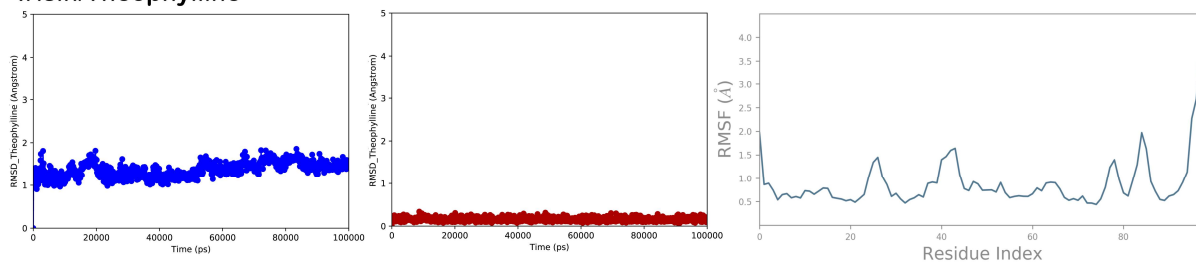**Irisin/Salvianolic\_acid\_B**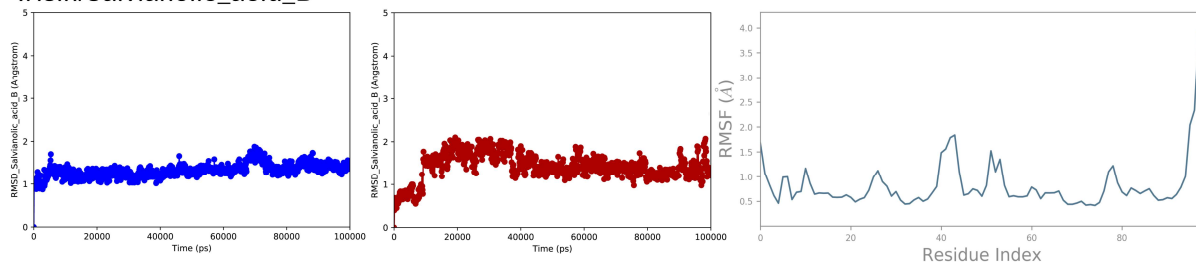**Irisin/Noradrenaline**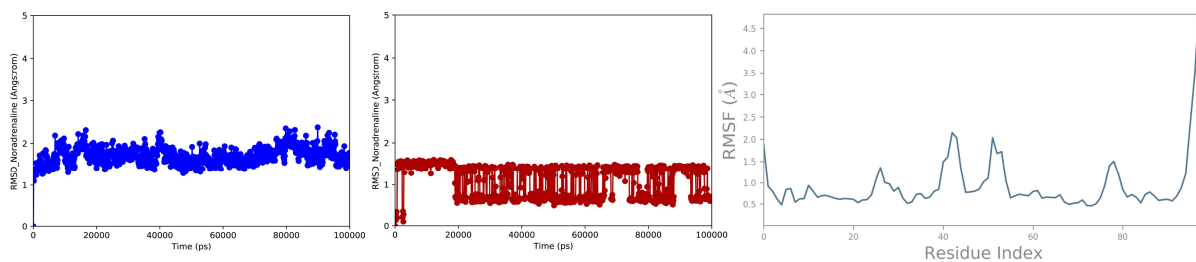

**Figure S1.** RMSD calculation (protein (blue line) and ligand (red line)) and RMSF evaluation for each complex, selected by docking studies, after 100 ns of MD simulation. Pictures were generated by Maestro (Maestro, Schrödinger LLC, release 2020-3).
